# Supplementary material
Source: publisher figshare collection journal article supplement (https://springernature.figshare.com/ndownloader/files/15185828)
Supplement: Supplementary file [file 15185828]

(A) Thioredoxin

CS|c41671\_g1 NGNPLIFDGD MGNNGNVLGW  
HV|c45692\_g1 NGNPLIFDGD IVSGSSVYVW

Glutathione S-transferase

CS|c55349\_g13 MKLTYNITLSQ PSRAVYIFLQ IYVTPFQSYS LNLLHGEHRT DEYTAINPFC  
HV|c37968\_g1 MKLTFDLTSQ PSRAVYIFLQ RYKTPETKA VALRKGEHRT DEYTAINPFC

Antimicrobial peptide

CS|c85585\_g1 MAVAHQSGLL APASGTLVRQ ASARTTTSVA D  
HV|c33176\_g1 MAVAHQSGLL APAPETLVRQ ASARTTTSVA D

Rhodanese

CS|c54815\_g3 MSDITYEELS GILDSHIMD VRNRDEVERL GQIFGSHCVB LGEIEDANAM DSSSECKRYG FAKPTINTLAL VTHCRTGVRA RRAGNHLTSQ GYQARVYVGS  
HV|c37898\_g1 MSDITYEELS SNLCSHILD VRNRDEVERN GQIFGSHCVB LGEIEDANAM DSSSECKRYG FAKPTGKGLI VTHCLKGERA RRAGDHLTSQ GYQARVYVGS

CS|c54815\_g3 FTDWNERKCG IDLGKPFVFS S  
HV|c37898\_g1 FTDWSEKCK VDSGKPFVFS S

(B) DNA repair protein RAD4

CS|c53690\_g1 QRFVAVFGCK KFDGIYFPNR FHSGWTHPVY DGYVVCEEFR GVLMDLWNQ  
HV|c45151\_g1 QRFVAVFGCK KFDGIYFPNR FHSGWTHPVY DGYVVCEEFR EVLMDLWNQ

p53 protein

CS|c56956\_g1 LAVEXTFMTI QVSSYQPTIR  
HV|c46996\_g1 LAVEXTFMTI QVASYQPTIR

Serine/arginine-rich splicing factor

CS|c9486\_g1 FKLTTEDWE  
HV|c20005\_g1 FKLTTEDWE

ATP-dependent DNA helicase 2

CS|c51201\_g1 RWAGDQVLVV DYECIVWIAL PFQDVRMFES GASGARVMTK  
HV|c41323\_g1 RWAGDQVLVV DYECIVWIEL PFQDNVRMFES GASGARIMTK

Zinc finger protein 268

CS|c10683\_g1 SAPDCKLVDR  
HV|c22836\_g1 SAPDCKLVDR

**Additional file 7: Figure S4** Partial alignment of positively selected genes. (A) Positively selected genes related to stress response and immunity. (B) Positively selected genes related to genetic information progressing.
